# MIND TO MIND

Creative writing that explores the abstract side of our profession and our lives

*Stephen T. Harvey, M.D., Editor*

## Dear Dr. Park, it's June again

Carolyn Oliver

D  
Dear Dr. Park, it's June again,  
this one so wet and cool twilight spills  
over the hours like a storm tide over houses,  
  
and I'm half here, watching my son's  
taffy-stretched limbs starfishing  
across the bright green lawn gone to clover  
  
and half submerged in a years-ago June,  
in the night I was so far under the pain  
I forgot how to hate your needles, Dr. Park,  
  
and then I forgot to fear you too,  
in the morning when I could feel everything  
and begged you for the gift of feeling nothing  
  
(or almost nothing, except the burrowing bass  
beat under my skin, the tug and endless,  
endless pull of parting, breath by breath)  
  
which you gave me—I had enough nothing  
that my arms trembled, empty, same as now,  
until my son jumps to help me lift him,

This poem is one of the finalists of ANESTHESIOLOGY's 2019 annual creative writing competition, The Letheon. carolyn.r.oliver@gmail.com.

Accepted for publication January 29, 2020. Published online first on March 2, 2020.

Permission to reprint granted to the American Society of Anesthesiologists, Inc. by copyright author/owner. Anesthesiology 2020; 133:458–9. DOI: 10.1097/ALN.0000000000003215

jumps to reach the lanugo-soft petunias  
sending out their waves of languid sweetness  
for the evening pollinators, sighing

it's not over yet, the work's not done  
and oh Dr. Park, can you recommend  
something to take the edge off time's routine

procedure, the severing of each moment from  
its mother—I want to be awake for this life, I do,  
but I can't surface for every scalpel slice,

I need a dreamy estuary present, because  
somehow—I wasn't ready, but somehow,  
it's June again, dear Dr. Park.
